# Supplementary material for: The impact of microstructural features of carbon supports on the electrocatalytic hydrogen evolution reaction
Source: Royal Society of Chemistry journal article supplement (doi:10.1039/c8cy02549e), 2019-01-01
Supplement: c8cy02549e1.pdf [file c8cy02549e1.pdf]

## Electronic Supplementary Information (ESI)

### **The impact of microstructural features of carbon support on the electrocatalytic hydrogen evolution reaction**

Munzir. H. Suliman,<sup>a,b</sup> Alaaldin Adam,<sup>a</sup> Mohammad N. Siddiqui,<sup>b</sup> Zain H. Yamani,<sup>a</sup> Mohammad Qamar,<sup>\*a</sup>

<sup>a</sup>Center of Excellence in Nanotechnology (CENT), <sup>b</sup>Department of Chemistry, King Fahd University of Petroleum and Mineral, Dhahran 31261, Saudi Arabia.

\*Corresponding author – [qamar@kfupm.edu.sa](mailto:qamar@kfupm.edu.sa)

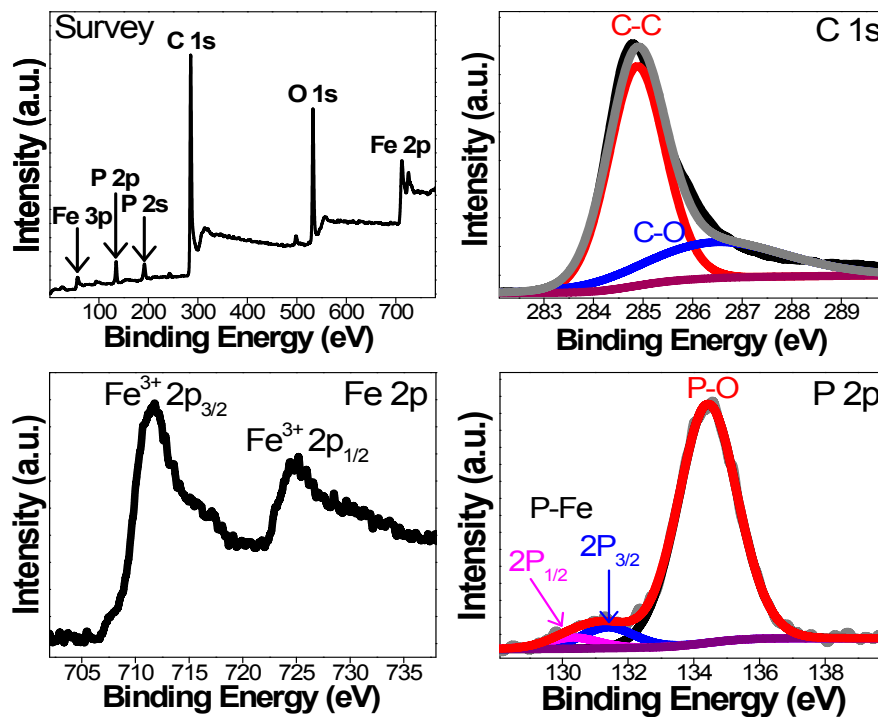

Fig. S1 XPS signatures of FeP/CNT.

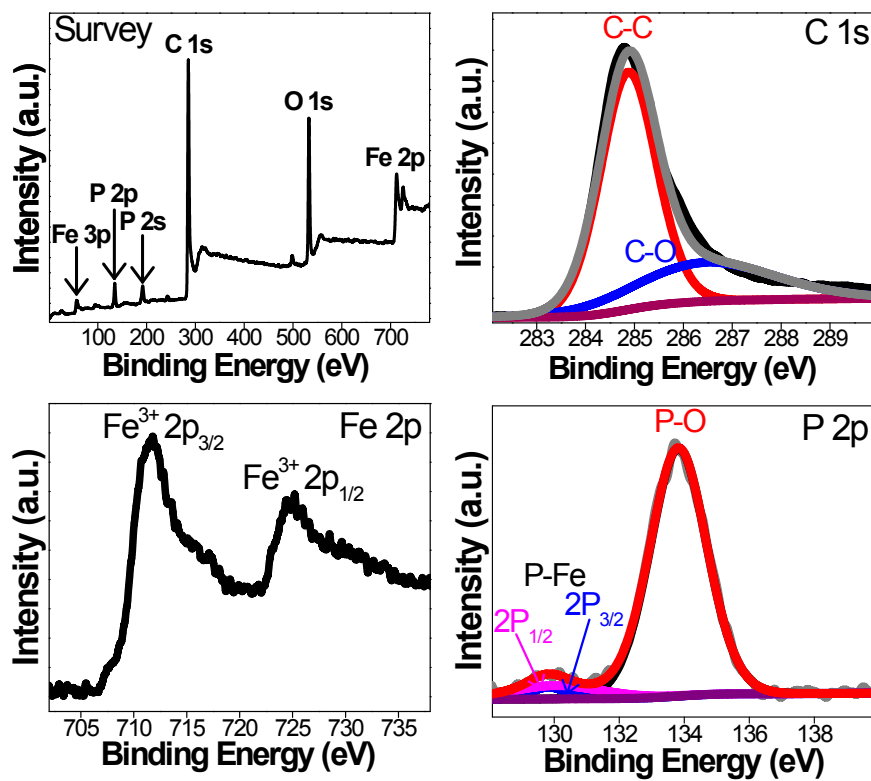

Fig. S2 XPS signatures of FeP/XC.

**Table S1** Results of elemental analyses of FeP/CN, FeP/CNT and FeP/XC.

| Electrocatalyst | Theoretical composition |      |      | Calculated composition |      |      |
|-----------------|-------------------------|------|------|------------------------|------|------|
|                 | Fe%                     | P%   | C%   | Fe%                    | P%   | C%   |
| FeP/CN          | 33.1                    | 17.4 | 49.5 | 32.4                   | 20.3 | 47.3 |
| FeP/CNT         | 33.1                    | 17.4 | 49.5 | 32.9                   | 20.2 | 46.9 |
| FeP/XC          | 33.1                    | 17.4 | 49.5 | 32.6                   | 18.8 | 48.6 |

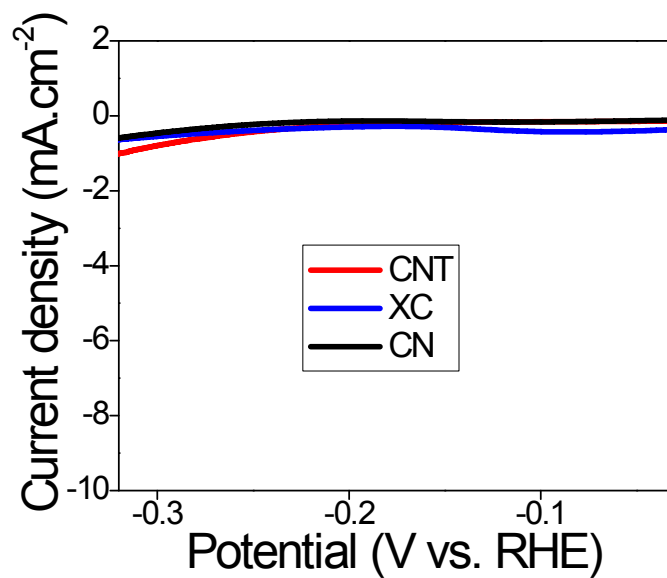

**Fig. S3** Comparative polarization curves of pure XC, CNT and CN in 0.5 M H<sub>2</sub>SO<sub>4</sub>.

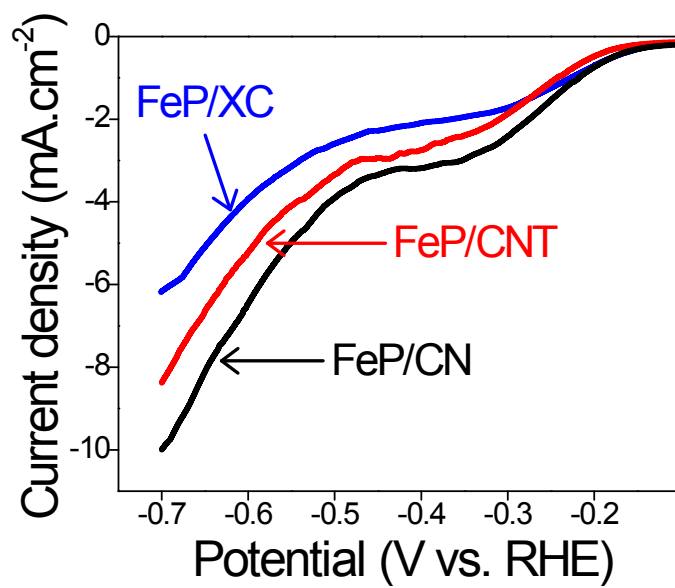

**Fig. S4** Comparative polarization curves of FeP/XC, FeP/CNT and FeP/CN in phosphate buffer pH 7.

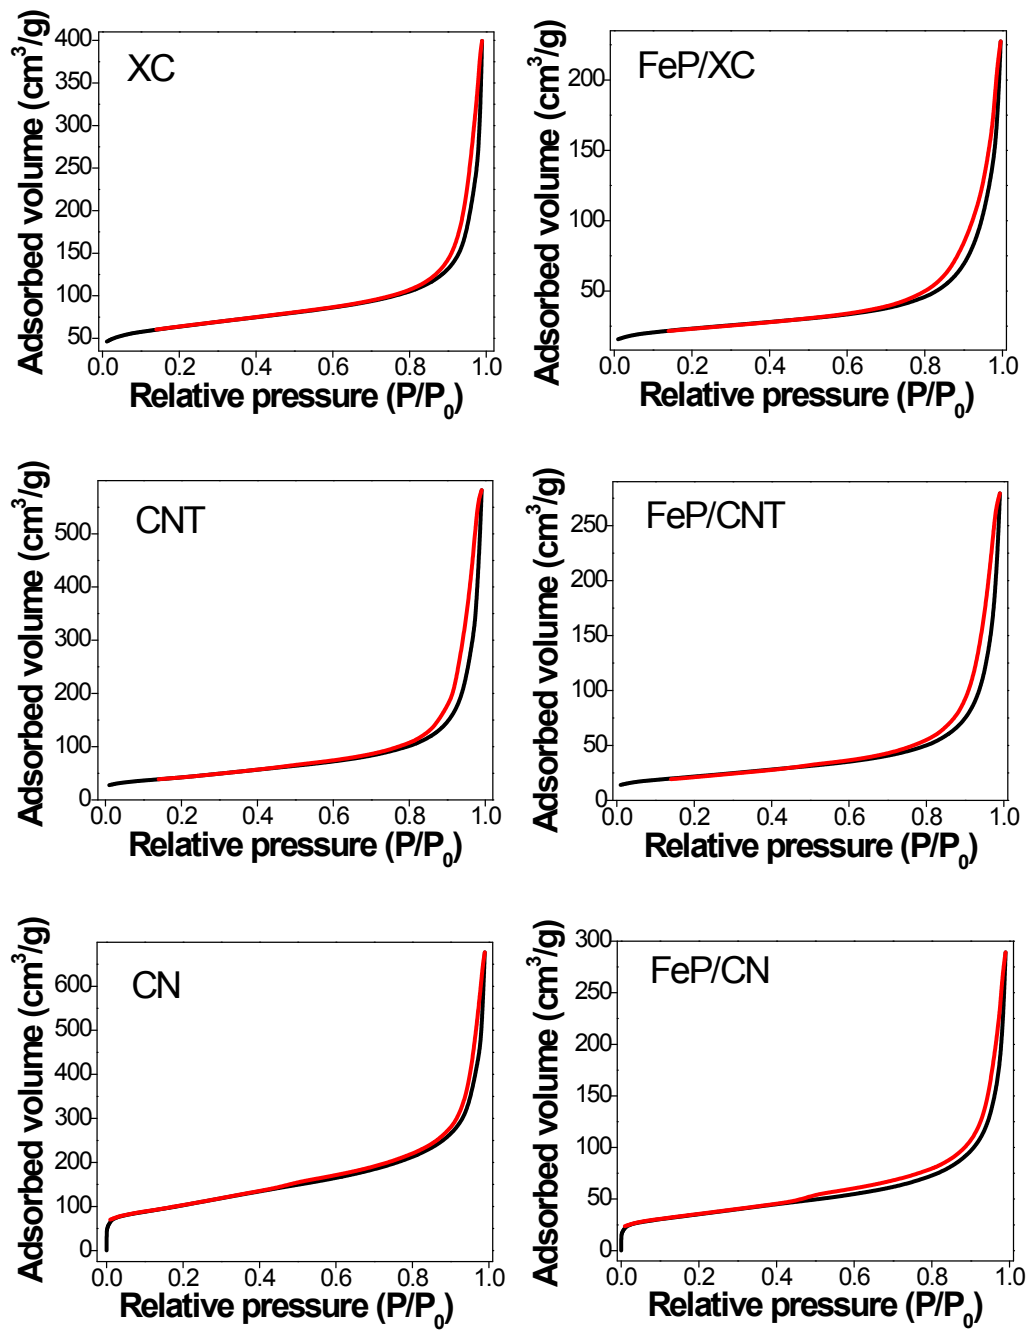

**Fig. S5** Nitrogen adsorption-desorption isotherms of pristine carbon and FeP-modified carbon.

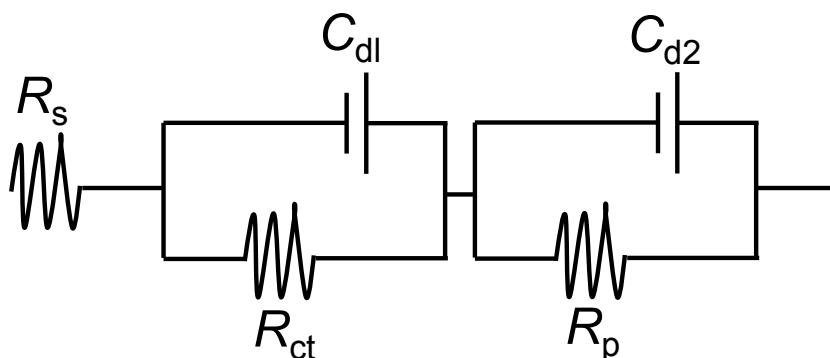

**Fig. S6** Two time constant electrical equivalent circuit model utilized to fit the electrochemical impedance (EIS) results of hydrogen evolution reaction.  $R_s$  – series resistance,  $C_{dl}$  and  $C_{d2}$  are double layer capacitance,  $R_{ct}$  – charge transfer resistance for HER,  $R_p$  – resistance related to the surface porosity.

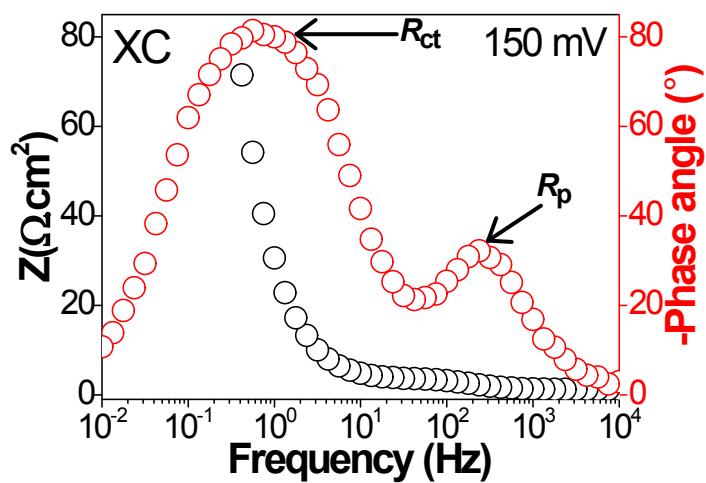

**Fig. S7** Representative Bode plot of pristine XC carbon electrodes showing the presence of two-time constants.

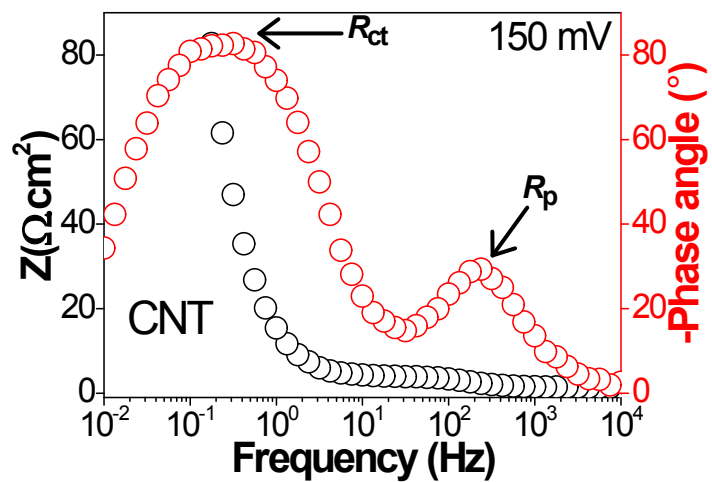

**Fig. S8** Representative Bode plot of pristine CNT electrode showing the presence of two-time constants.

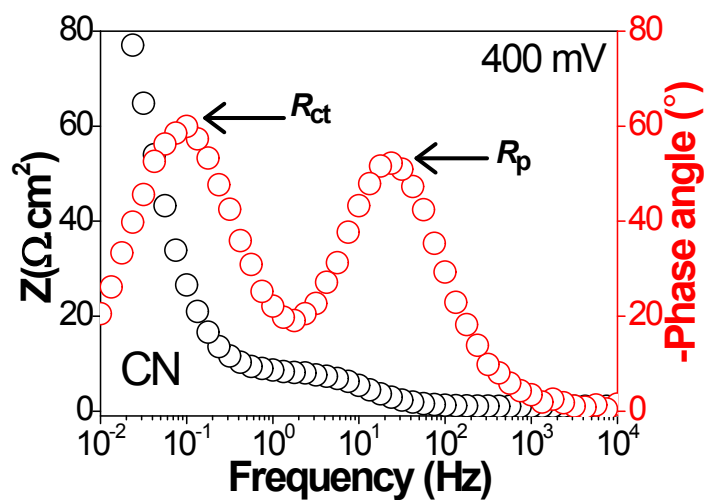

**Fig. S9** Representative Bode plots of pristine nanosheets electrode showing the presence of two-time constants.

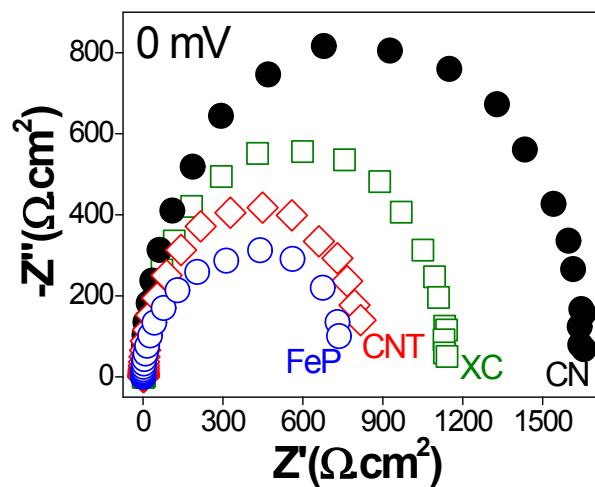

**Fig. S10** Nyquist plots of pristine carbon and FeP electrodes showing intrinsic electrical conductivity.

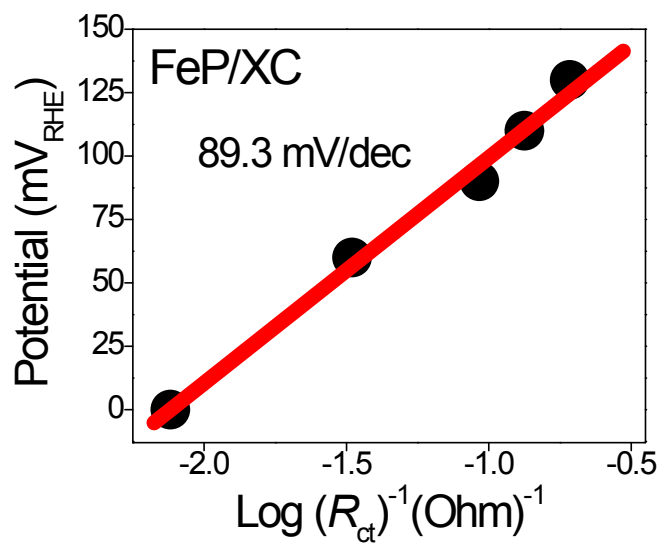

**Fig. S11** Tafel slope of FeP/XC.



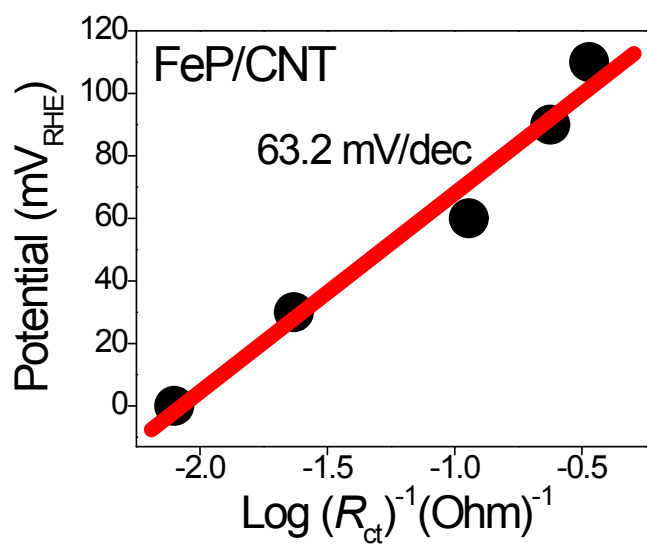

Fig. S12 Tafel slope of FeP/CNT.

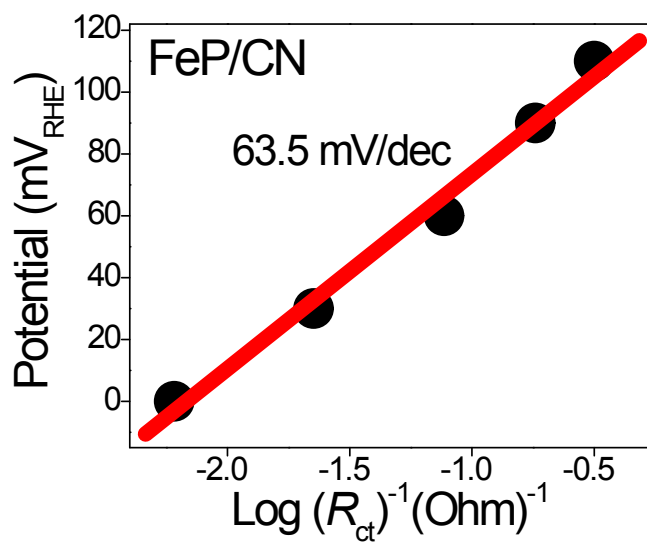

Fig. S13 Tafel slope of FeP/CN.

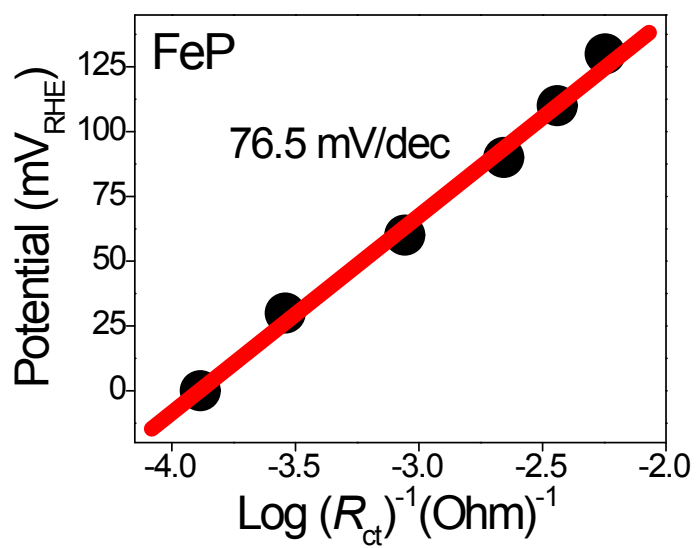

**Fig. S14** Tafel slope of pure FeP.

**Table S2** Electrochemical impedance values of pristine carbon and pure FeP obtained by fitting their Nyquist Plots.

| Potential<br>(mV) | CN    |                        |          | CNT   |                        |          | XC    |                        |          | FeP   |                           |
|-------------------|-------|------------------------|----------|-------|------------------------|----------|-------|------------------------|----------|-------|---------------------------|
|                   | $R_s$ | $R_p$<br>$\Omega.cm^2$ | $R_{ct}$ | $R_s$ | $R_p$<br>$\Omega.cm^2$ | $R_{ct}$ | $R_s$ | $R_p$<br>$\Omega.cm^2$ | $R_{ct}$ | $R_s$ | $R_{ct}$<br>$\Omega.cm^2$ |
| 0                 | 3.32  | 5.91                   | 1685     | 0.72  | 1.22                   | 860.7    | 0.88  | 1.42                   | 1146     | 0.87  | 785.3                     |
| 30                | 3.29  | 6.30                   | 1520     | 1.12  | 1.30                   | 804.5    | 0.83  | 1.50                   | 870.7    | 0.85  | 457.7                     |
| 60                | 3.07  | 5.8                    | 1408     | 0.86  | 1.54                   | 603.1    | 0.71  | 1.26                   | 788.3    | 0.81  | 99.3                      |
| 90                | 2.87  | 5.48                   | 1323     | 0.57  | 1.00                   | 403.9    | 0.78  | 1.03                   | 731.8    | 0.83  | 58.5                      |
| 110               | 2.35  | 5.3                    | 1207     | 1.48  | 1.25                   | 357.3    | 1.13  | 1.30                   | 657      | 0.88  | 31.8                      |
| 130               | 2.76  | 4.67                   | 1126     | 0.76  | 1.45                   | 243.5    | 1.21  | 1.76                   | 612.9    | 0.73  | 16.4                      |
| 150               | 2.44  | 5.5                    | 1006     | 1.03  | 1.30                   | 97.7     | 1.23  | 1.30                   | 563.2    | 0.77  | 11.6                      |

**Table S3** Electrochemical impedance values of FeP-modified carbon obtained by fitting their Nyquist Plots.

| Potential<br>(mV) | FeP/CN |                                         |          | FeP/CNT |                                         |          | FeP/XC |                                         |          |
|-------------------|--------|-----------------------------------------|----------|---------|-----------------------------------------|----------|--------|-----------------------------------------|----------|
|                   | $R_s$  | $R_p$<br>( $\Omega \cdot \text{cm}^2$ ) | $R_{ct}$ | $R_s$   | $R_p$<br>( $\Omega \cdot \text{cm}^2$ ) | $R_{ct}$ | $R_s$  | $R_p$<br>( $\Omega \cdot \text{cm}^2$ ) | $R_{ct}$ |
| 0                 | 0.99   | 0.17                                    | 148.2    | 0.98    | 0.15                                    | 126.1    | 0.946  | 0.15                                    | 131.2    |
| 30                | 0.96   | 0.17                                    | 45.3     | 0.95    | 0.17                                    | 42.8     | 0.941  | 0.15                                    | 110.5    |
| 60                | 0.94   | 0.16                                    | 10.5     | 0.93    | 0.22                                    | 8.8      | 0.922  | 0.08                                    | 30.2     |
| 90                | 0.99   | 0.17                                    | 5.25997  | 0.91    | 0.23                                    | 4.21     | 0.932  | 0.1                                     | 10.8     |
| 110               | 0.92   | 0.15                                    | 3.07     | 0.82    | 0.12                                    | 2.96     | 1.01   | 0.07                                    | 7.5      |
| 130               | 0.94   | 0.17                                    | 2.67     | 0.97    | 0.12                                    | 2.5      | 0.99   | 0.01                                    | 5.2      |
| 150               | 0.90   | 0.16                                    | 2.28923  | 0.85    | 0.16                                    | 2.18     | 0.903  | 0.03                                    | 4.1      |

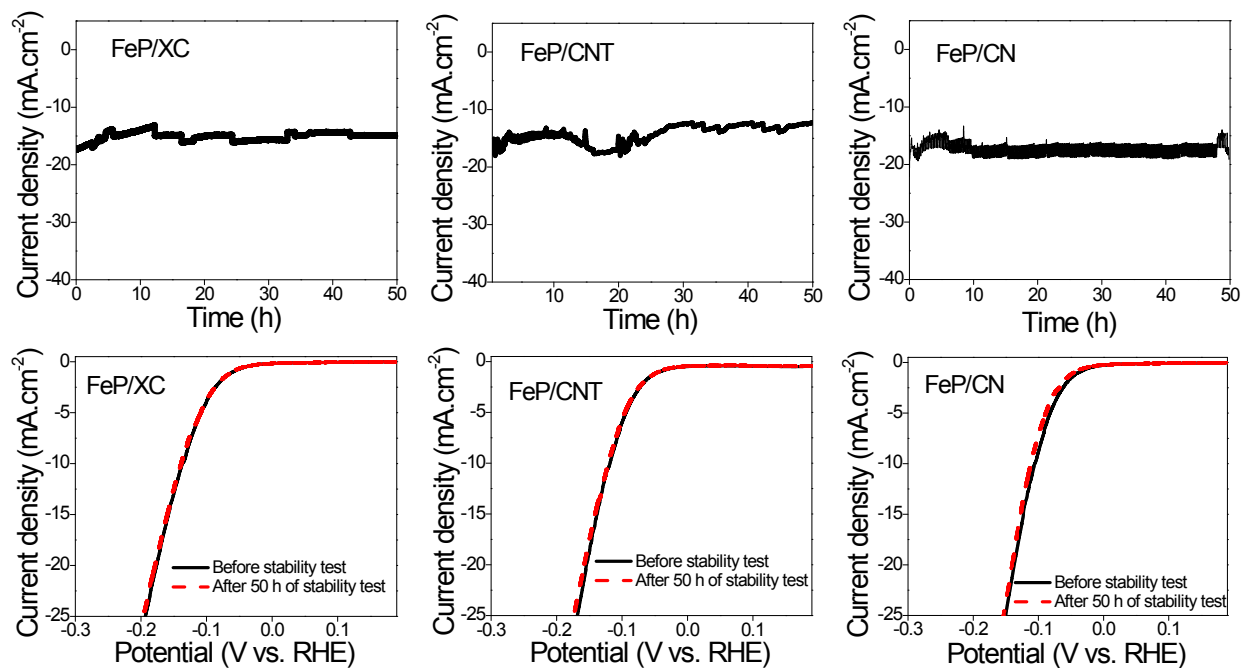

**Fig. S15** Current-time and polarization curves obtained before and after potentiostatic experiments.
